# Supplementary material for: Elav-Mediated Exon Skipping and Alternative Polyadenylation of the Dscam1 Gene Are Required for Axon Outgrowth
Source: PubMed Central journal article supplement — Cell Rep. Author manuscript; Available in PMC 2020 Mar 24. (PMC7092717; doi:10.1016/j.celrep.2019.05.083), 2019-06-25
Supplement: NIHMS1573467-supplement-1.pdf [file NIHMS1573467-supplement-1.pdf]

**Cell Reports, Volume 27**

**Supplemental Information**

**Elav-Mediated Exon Skipping and Alternative**

**Polyadenylation of the *Dscam1* Gene**

**Are Required for Axon Outgrowth**

**Zhiping Zhang, Kevin So, Ryan Peterson, Matthew Bauer, Henry Ng, Yong Zhang, Jung Hwan Kim, Thomas Kidd, and Pedro Miura**

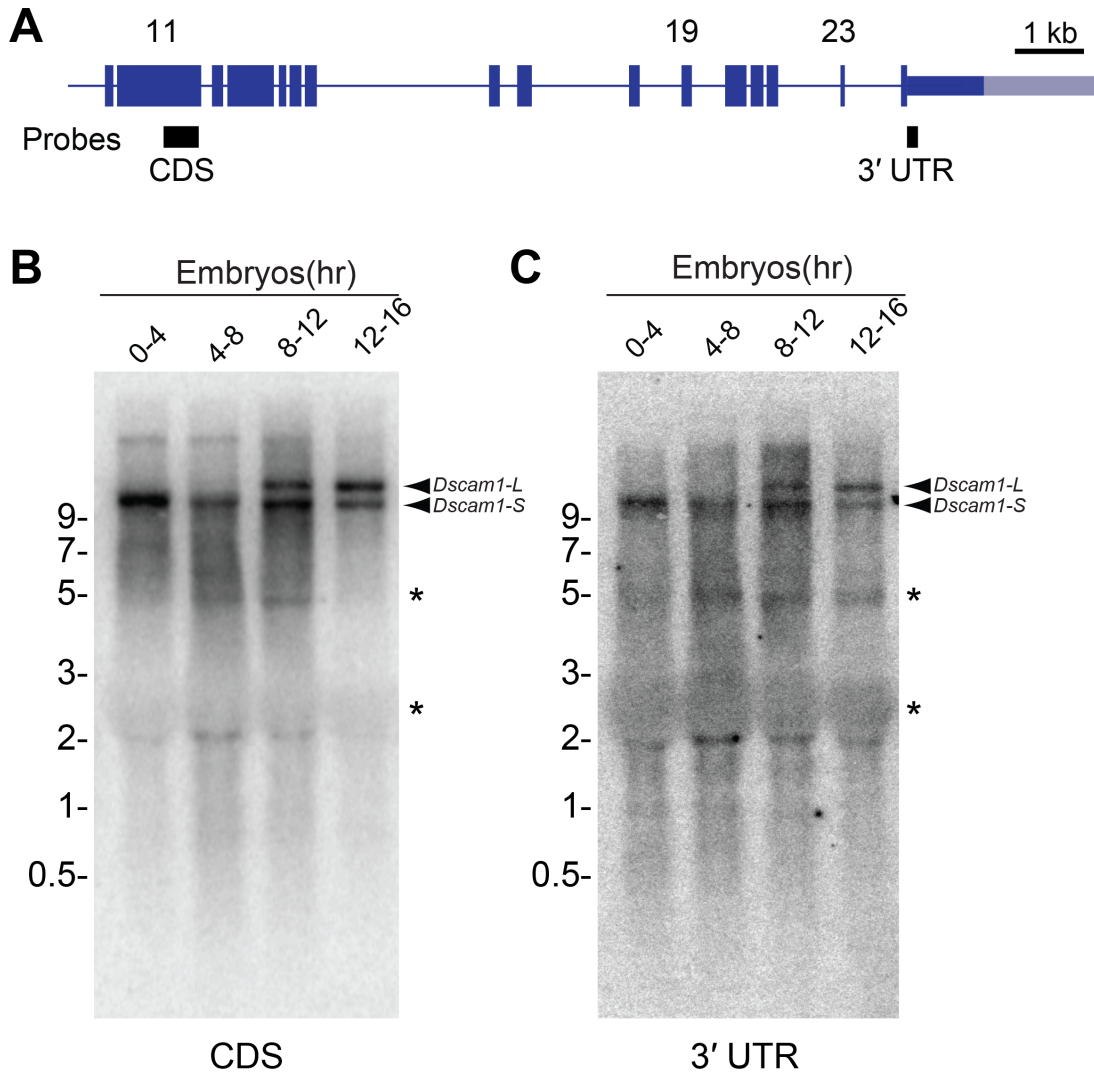

**Figure S1. Northern analysis of *Dscam1* during embryonic development. Related to Figure 1. (A)** Schematic of Northern probe locations. **(B)** Non-cropped northern blot using a probe to *Dscam1* exon 11 which is expressed in all *Dscam1* isoforms (CDS). **(C)** Stripped and re-probed blot using probe targeting the proximal 3' UTR (3' UTR). \*, denotes common background bands often observed with these *Drosophila* northern blots.

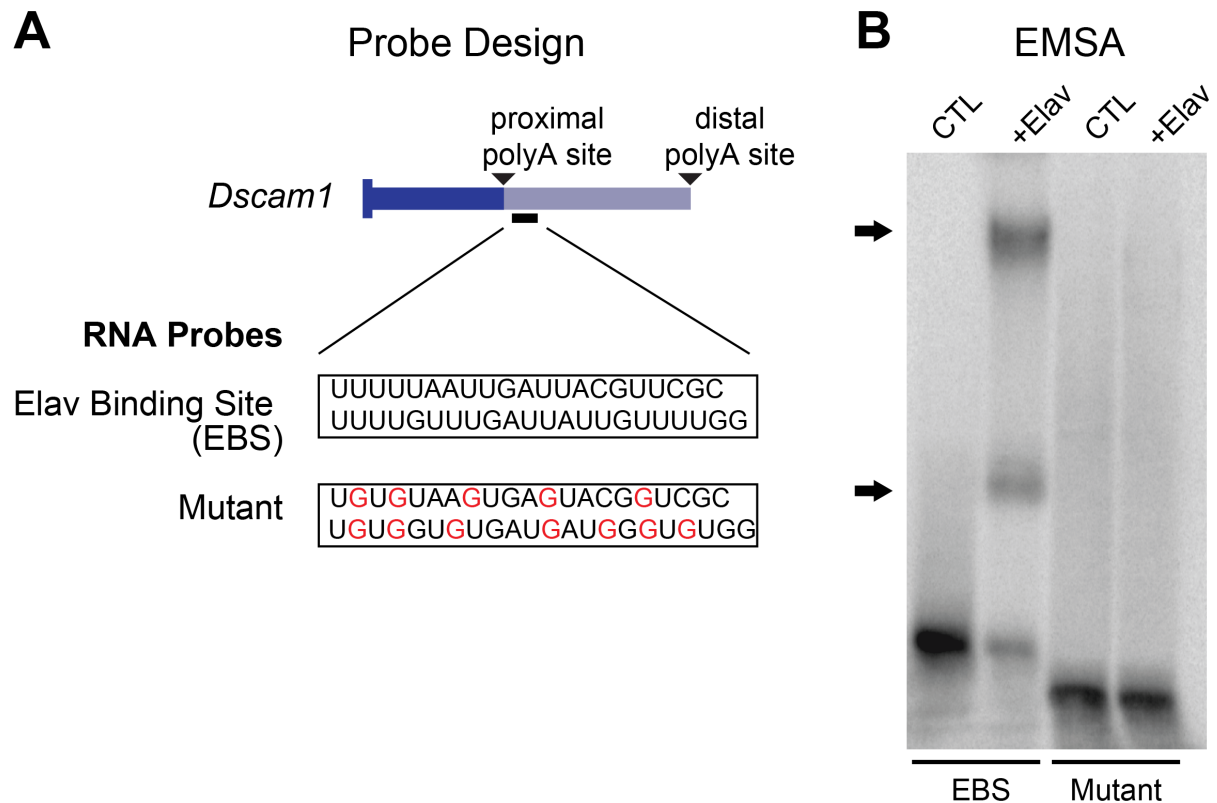

**Figure S2. EMSA demonstrates Elav binds a U-rich region downstream of the *Dscam1* proximal polyA site. Related to Figure 1. (A)** Schematic showing probe design with location of proximal 3' UTR Elav binding site (EBS) probe used in RNA electrophoretic mobility shift assays (EMSA). Mutant probe has disrupted integrity of U-rich stretches generated by U to G mutations (indicated in red text). **(B)** EMSA reveals that upon the addition of recombinant purified Elav, an upward shift occurs, indicating Elav binding. Elav has been shown to bind as a multimer (Soller and White, 2005) which might explain the higher molecular weight supershift. Mutant probe was incapable of Elav binding, as evidenced by the lack of shift.

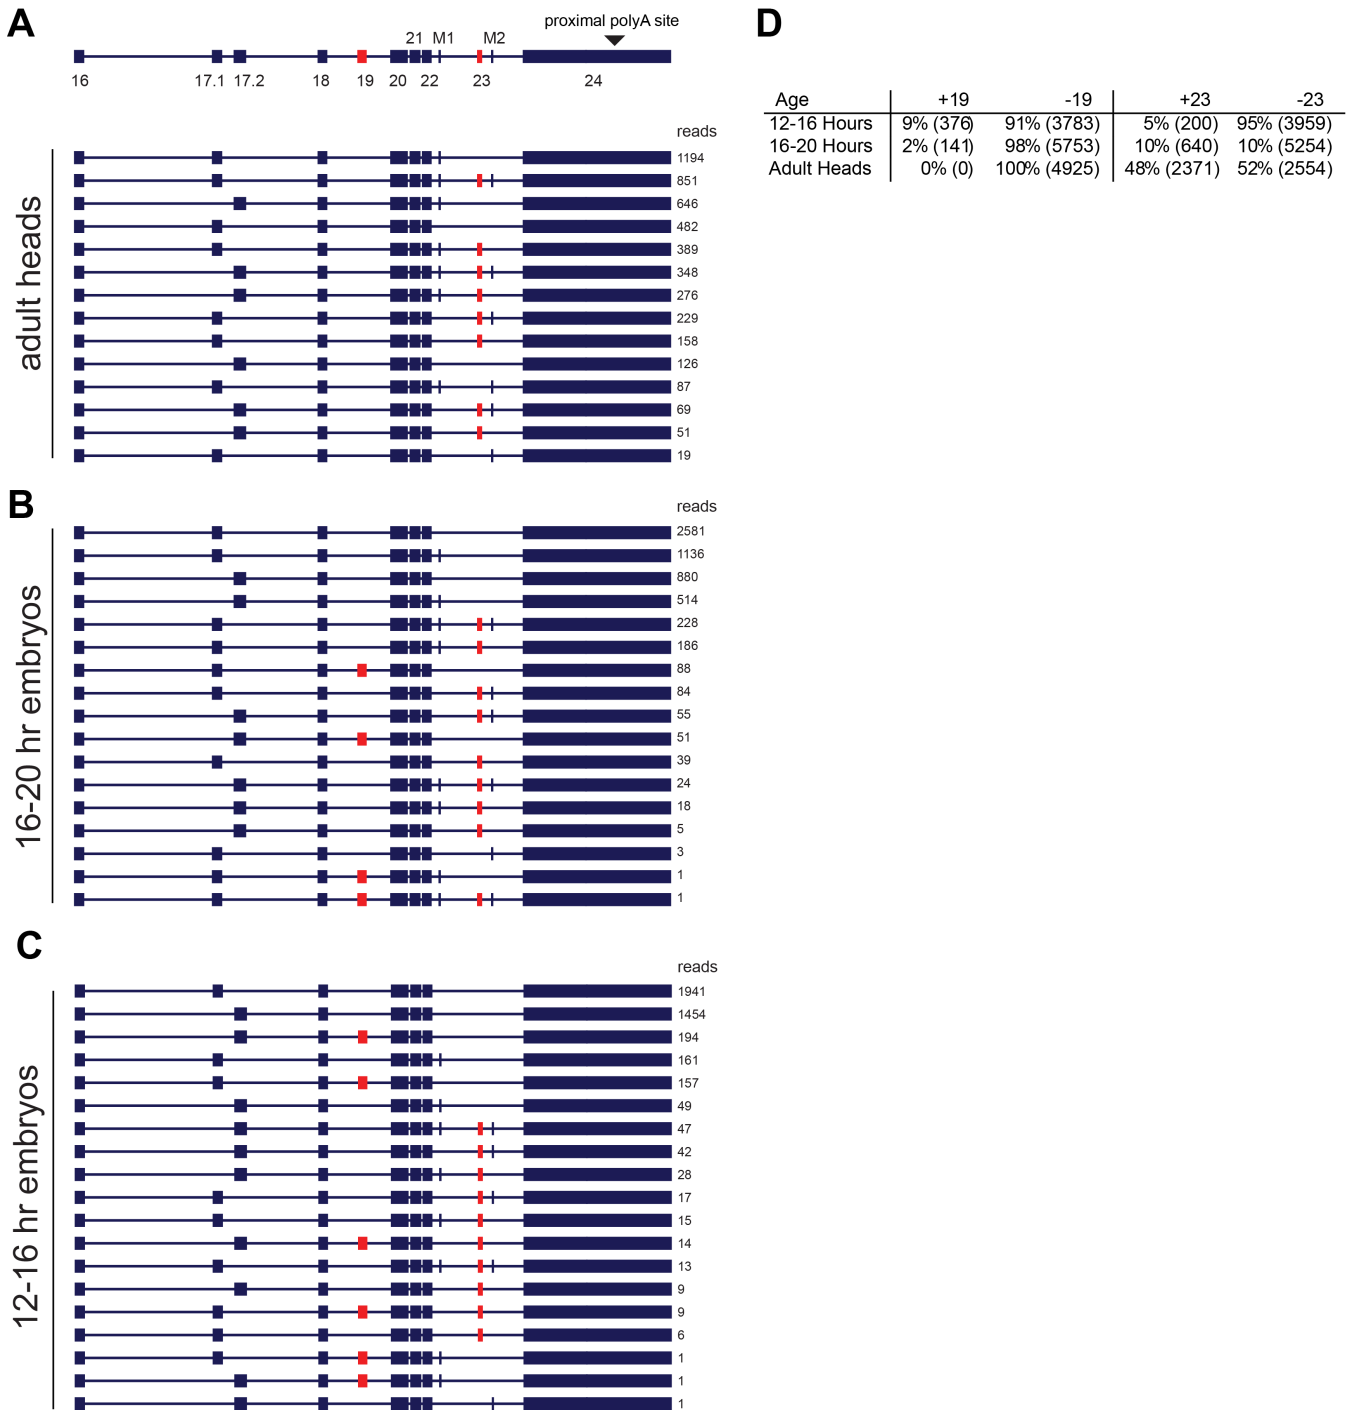

**Figure S3. Frequency of *Dscam1* transcript isoforms connected to extended 3' UTR determined by Nanopore sequencing of *Dscam1*. Related to Figure 3. (A) Adult heads. (B) 16-20 hr embryos. (C) 12-16 hr embryos. (D) Summary table showing the frequencies of exons 19 and 23 in transcripts including the extended 3' UTR. M1- microexon 1, M2- microexon 2.**

**A**

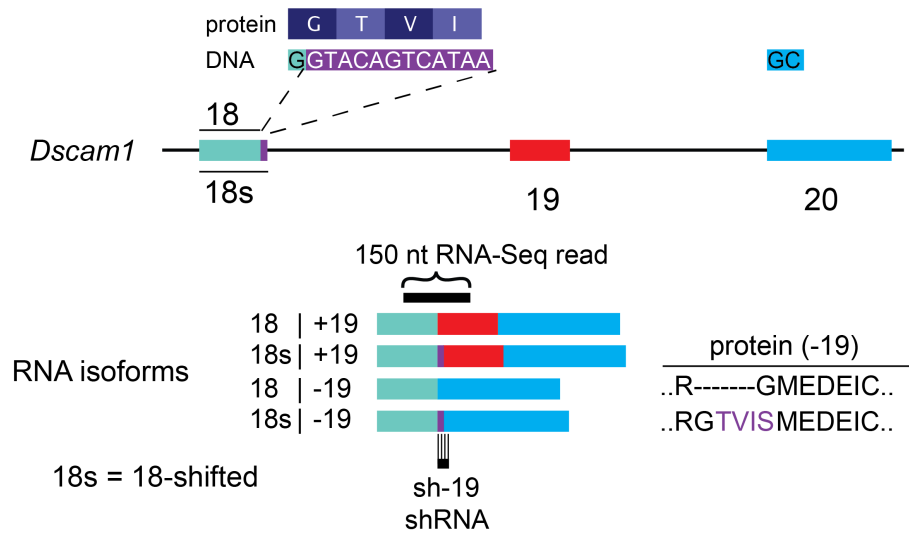

**B**

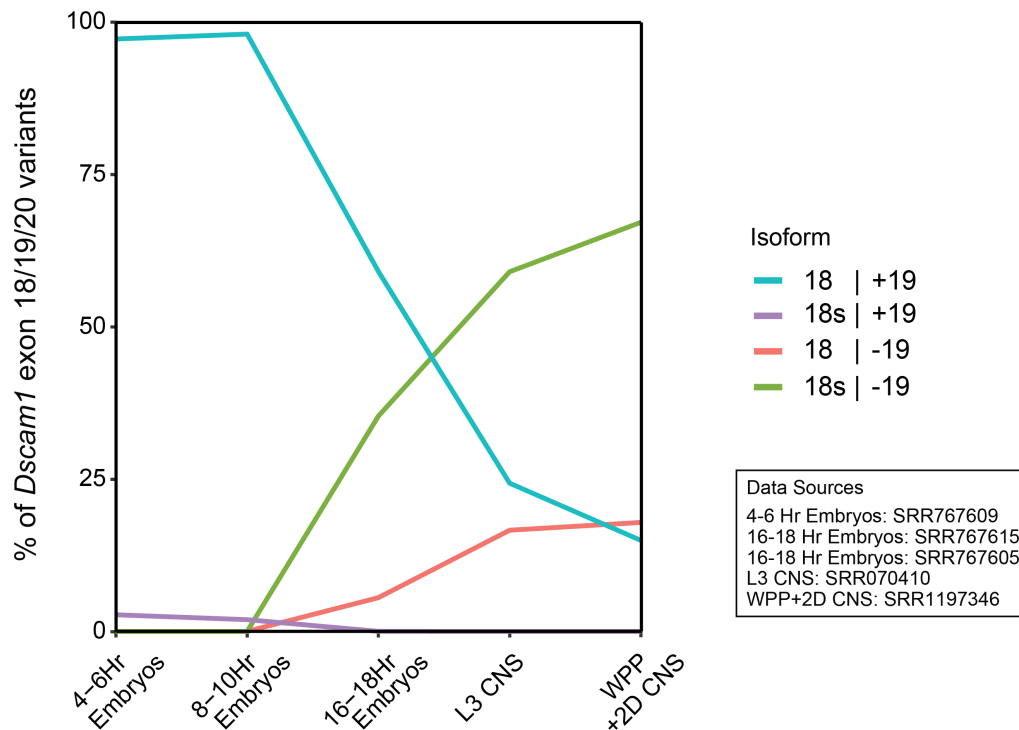

**Figure S4. Exon 18/18s/19/20 usage determined from short read RNA-Seq data. Related to Figures 3 & 4. (A)** Schematic of *Dscam1* exon usage from exons 18 to 20. An exon 18 variant that is 12 nt longer at the 3' end is named 18-shifted (18s) (highlighted in purple). Compared to the 18 | -19 isoform, the 18s | -19 isoform gains the amino acid sequence T-V-I-S. Note the location of the sh-19 shRNA that uniquely knocks down 18s | -19 isoforms. RNA-Seq short-reads (150 nt) had sufficient length to resolve the connectivity between exons 18, 18s, 19, and 20. **(B)** Exon usage during embryonic development, L3 CNS, and WPP +2D CNS as analyzed from short read RNA-Seq data.

| Northern blot probes |                  |                                         |                                           |                        |                        |
|----------------------|------------------|-----------------------------------------|-------------------------------------------|------------------------|------------------------|
| Gene name            | probe name       | 5' primer                               | 3' primer                                 | probe coordinates      | Figure                 |
| GFP                  | GFP              | TAAACGGCCACAAGTTCAGC                    | CTGTACAGCTCGTCCATGC                       |                        | 1G                     |
| Dscam1               | Dscam1 coding    | GGTCTTGATCACTCGTTGG                     | CACCTACAACATTCGCATCG                      | chr2R:7331013-7331523  | 1B, 1D, 2A, 4A, 5B, S1 |
| Gapdh2               | Gapdh2           | GGCATCCACTCACTTGAAGG                    | TCAGCTTCACGAACCTGTCCG                     | chrX:15868647-15869257 | 1D, 1G, 2A, 5B         |
| Dscam1               | Dscam1 uni 3'UTR | ATTTGTAAGCGCCCTCTGC                     | ACTCCCTCTCTTCTCTATCTCT                    | chr2R:7320524-7320665  | S1                     |
| PCR primers          |                  |                                         |                                           |                        |                        |
| Parent gene          | Amplicon name    | 5' primer                               | 3' primer                                 | product coordinates    | Figure                 |
| Dscam1               | Dscam1-uni       | TCCGGAGTACAGGCTACCG                     | GGACAGTCCCTCAATCTACACG                    | chr2R:7322909-7323093  | 1F                     |
| Dscam1               | Dscam1-ext       | GCGTTTTAAACTGCCTGTCC                    | CAACTTCAACGCACATCAGG                      | chr2R:7318329-7318425  | 1F                     |
| Dscam1               | exon19           | CTGGAAGTTCATGGCCTTGG                    | TGTGACCGGATTAAAGCGAGG                     | chr2R:7323244-7324600  | 3B, 4B, 5F, 6A, 6B     |
| Dscam1               | exon23           | TGTTGGAGTTGGAGTTGTTTTGG                 | GAGAGTAATGAGATCTCAGAGGC                   | chr2R:7320729-7322623  | 3B                     |
| Rpl32                | Rpl32            | ACGTTGTGCACCAGGAACCT                    | CCGCCTCAAGGGACAGTATC                      | chr3R:3004576-30045580 | 4B, 5F, 6B, 6D, 6F     |
| Dscam1               | Nanopore 16-24   | ACTTGCCTGTGCTCTATCTTCTGTAGCTCCATTGCATCG | TTTCTGTTGGTGTGATATTGCCGAATACGACTTTGCCACCT | chr2R:7319384-7329325  | 3C, 3D, S3             |
| Dscam1               | Flag-exon20      | CAAGGATGACGATGACAAGG                    | ATCATCGTATTCGGGAGCTG                      |                        | 6D, 6F                 |
| qPCR primers         |                  |                                         |                                           |                        |                        |
| Parent gene          | Amplicon name    | 5' primer                               | 3' primer                                 | product coordinates    | Figure                 |
| Dscam1               | Dscam1-uni       | TCCGGAGTACAGGCTACCG                     | GGACAGTCCCTCAATCTACACG                    | chr2R:7322909-7323093  | 1C                     |
| Dscam1               | Dscam1-ext       | GCGTTTTAAACTGCCTGTCC                    | CAACTTCAACGCACATCAGG                      | chr2R:7318329-7318425  | 1C                     |
| Rpl32                | Rpl32            | ACGTTGTGCACCAGGAACCT                    | CCGCCTCAAGGGACAGTATC                      | chr3R:3004576-30045580 | 1C                     |
| Dscam1               | Dscam1-CDS       | GGCTGTTCTTTCGCTGGTAT                    | GCACATATGCTTCCACCAGGA                     | chr2R:7323099-7323194  | 1E                     |
| Dscam1               | Dscam1-EBS       | TGATTACGTTTCGCTTTTGTGG                  | TGTTGGTGGTGTCTCCACAG                      | chr2R:7319479-7319540  | 1E                     |
| Elav                 | Elav-CDS         | TCCGAGCAATAACACATCG                     | CTCCITTCGTCTGCATATCG                      | chrX:513912-513983     | 1E                     |
| Elav                 | Elav-EBS         | CTGTACGATTTTCGATTAAACAACCA              | AGAAAGATAGACAGAGAGGGAACAAGTA              | chrX:513912-513983     | 1E                     |

**Table S1: Oligonucleotide sequences. Related to Figures 1, 2, 3, 4, 5, 6.** Coordinates correspond to *D. Melanogaster* dm6 genome.

## **Supplemental Multimedia Files**

**Video #1. Related to Figures 2 and 4.** *Elav-GAL4/+; UAS-Dicer2/UAS-shExt* flies display impaired locomotion and could not fly. Flies were placed on pad without anesthesia.

**Video #2. Related to Figure 4.** *Elav-GAL4/+; UAS-Dicer2/UAS-sh-19* flies display impaired locomotion and could not fly. Flies were placed on pad without anesthesia.
